# Supplementary material
Source: Springer Nature journal article supplement (https://www.springermedizin.de/resource/supplementary/12936_2012_2198_MOESM1_ESM.pdf/9542664)

**M**

**1**

**2**

**3**

**4**

**5**

**6**

**500**—

**250**—

◀ **201**

◀ **115**

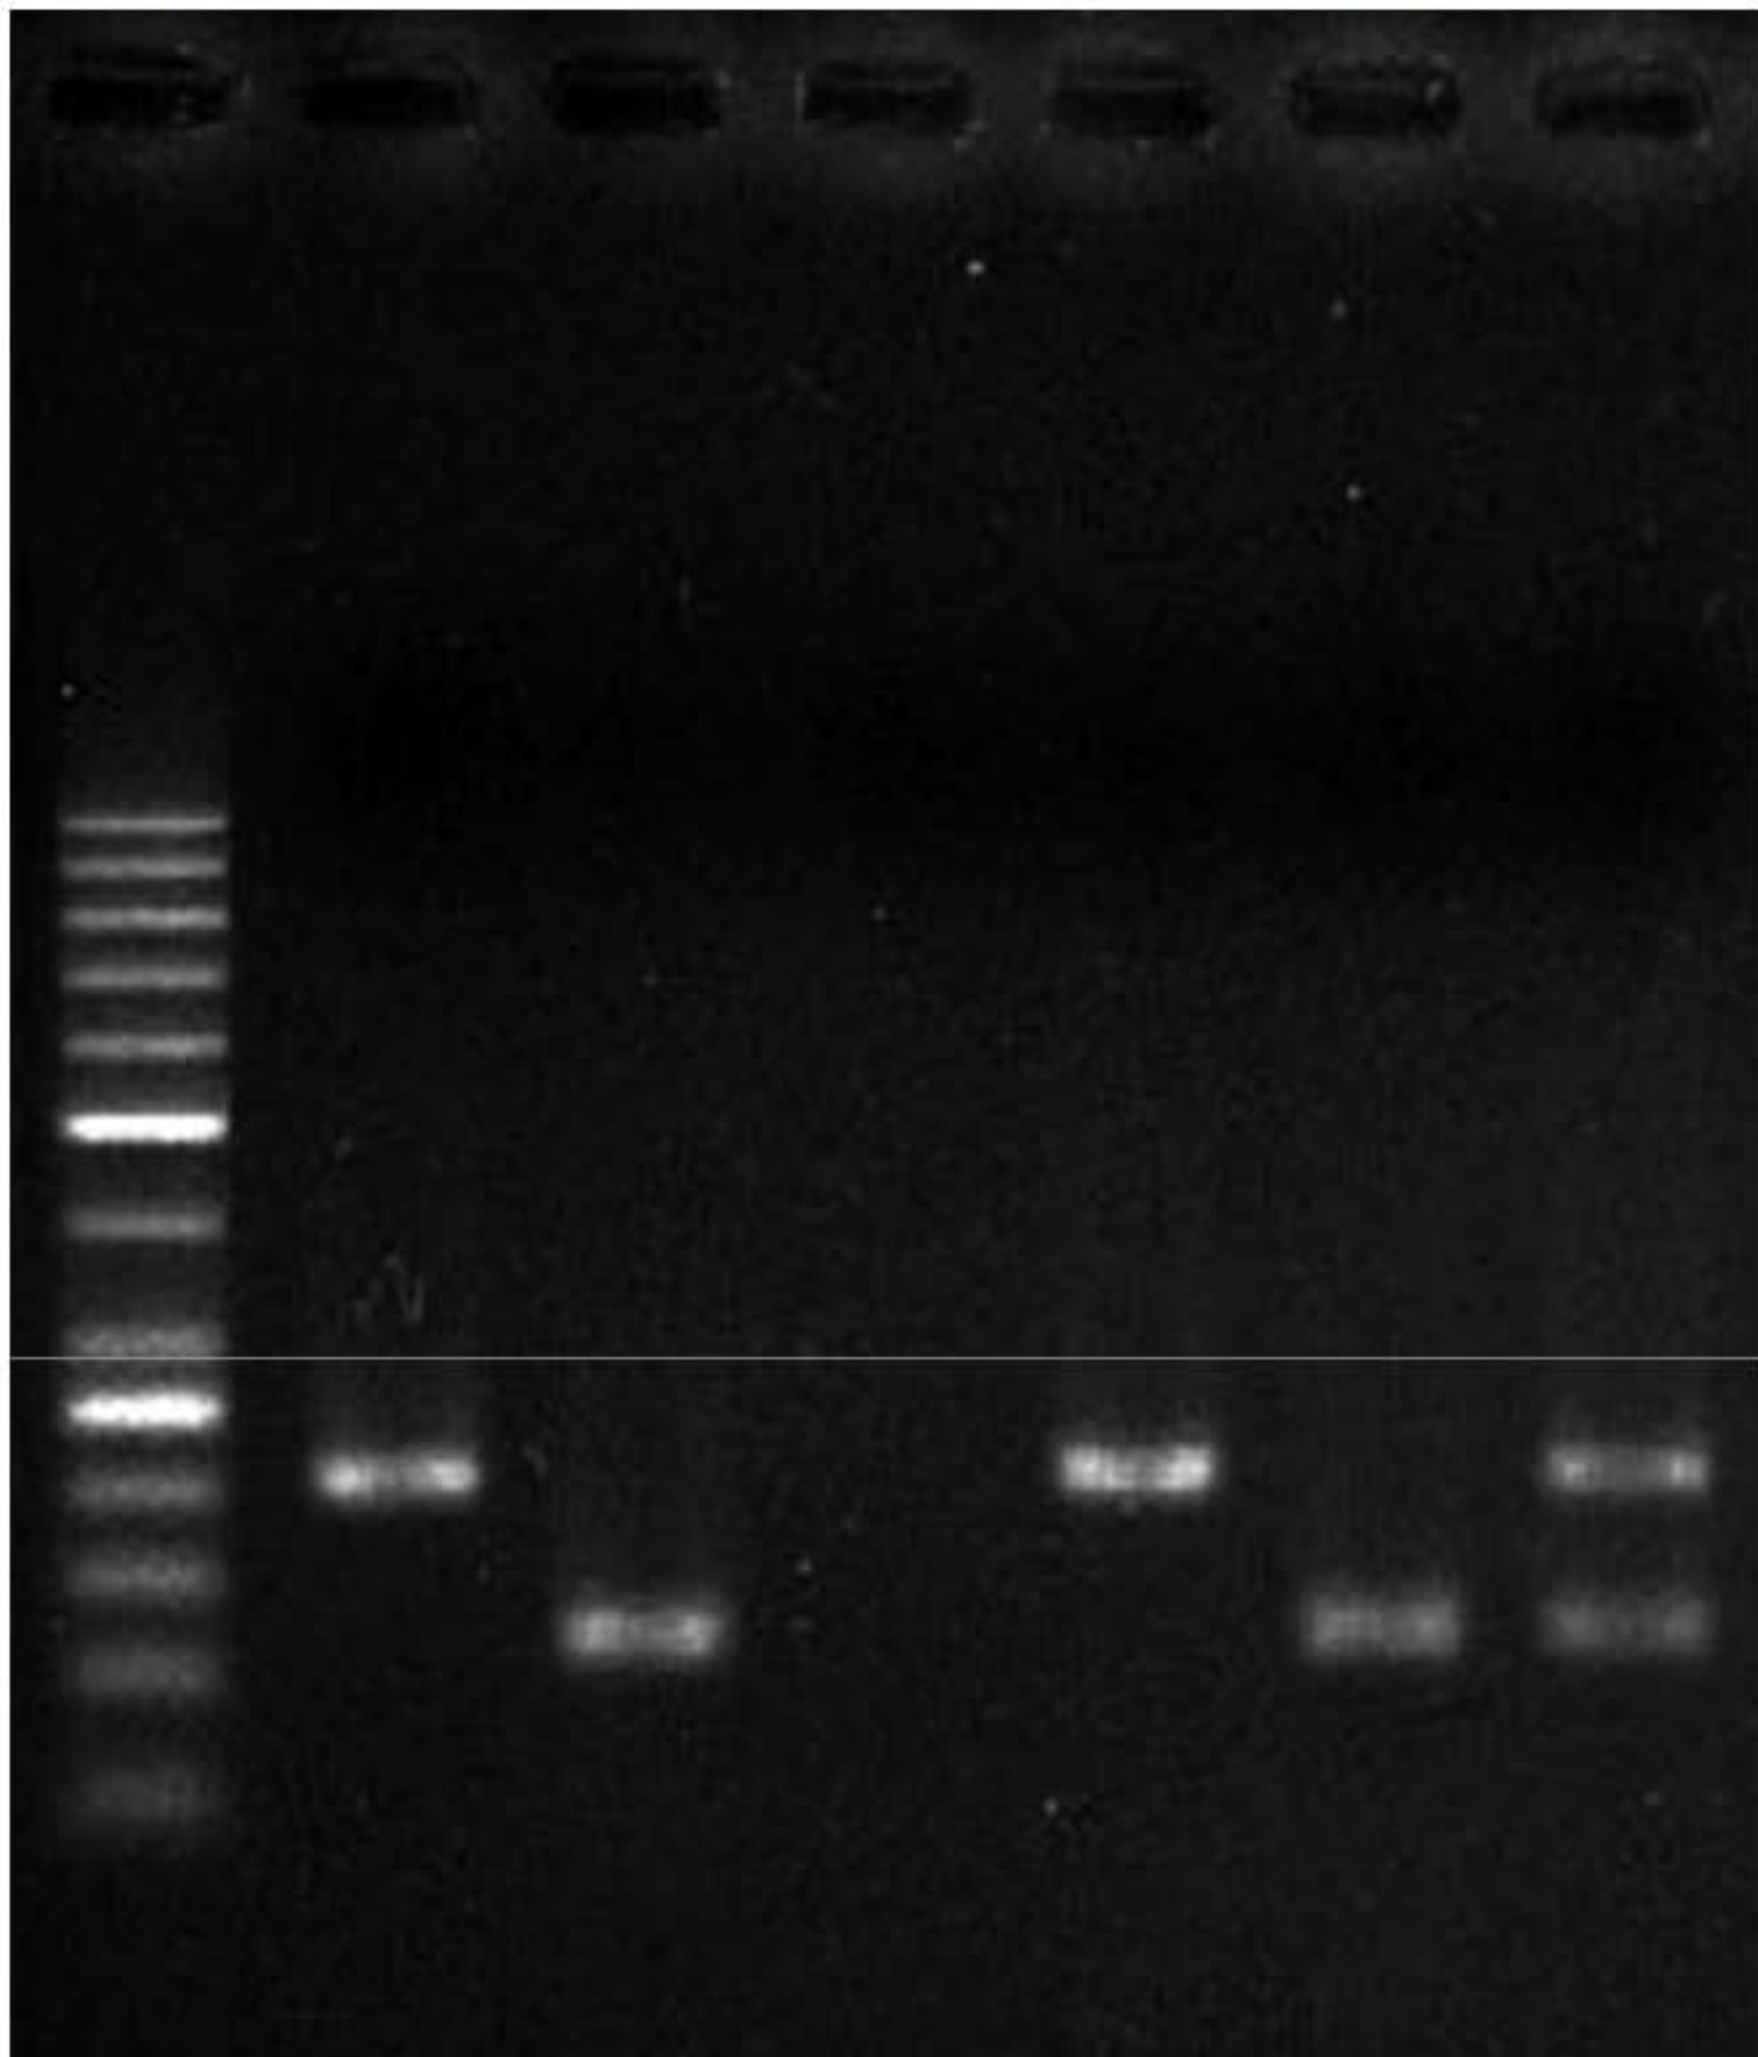

Supplement: MOESM1 [file 9542664]
